# Supplementary material for: Large Spatial Scale of the Phenotype-Environment Color Matching in Two Cryptic Species of African Desert Jerboas (Dipodidae: Jaculus)
Source: PubMed Central journal article supplement (PMC3979769; doi:10.1371/journal.pone.0094342), 2014-04-08
Supplement: pone.0094342.s001.pdf [file pone.0094342.s001.pdf]

Table S1. Samples included in the study and their GenBank accession numbers. "Collection" - catalogue number of the collection where specimens are housed: D - CIBIO, Centro de Investigação em Biodiversidade e Recursos Genéticos, Universidade do Porto, USNM - Smithsonian Institution National Museum of Natural History, Washington D.C. and ZBSC - ZB collection. Est - colour (Col) values estimated.

| Collection | Region                 | latitude  | longitude  | Col | cyt b GB | Collection         | Region                 | latitude  | longitude | Col | cyt b GB |
|------------|------------------------|-----------|------------|-----|----------|--------------------|------------------------|-----------|-----------|-----|----------|
| D100       | Mauritania             | 17.938317 | -12.267117 | -   | JN214504 | USNM325805         | Libya                  | 29.56667  | 24.70000  | Est | KC663563 |
| D1003      | Mauritania             | 20.377967 | -15.991150 | -   | JN214505 | USNM325819         | Libya                  | 30.55000  | 18.46667  | Est | KC663566 |
| D101       | Mauritania             | 17.938317 | -12.267117 | -   | JN214506 | USNM325821         | Libya                  | 31.18839  | 16.39905  | Est | KC663569 |
| D113       | Mauritania             | 17.692550 | -12.571133 | -   | JN214507 | USNM325828         | Libya                  | 29.58852  | 24.86402  | Est | KC663550 |
| D117       | Mauritania             | 17.392517 | -13.452850 | -   | JN214508 | USNM342028         | Egypt                  | 27.22097  | 30.80421  | Est | KC663543 |
| D1283      | West. Sahara (Morocco) | 22.446400 | -16.448383 | -   | JN214509 | USNM342030         | Egypt                  | 27.14105  | 31.38113  | Est | KC663528 |
| D144       | West. Sahara (Morocco) | 24.847250 | -14.844483 | -   | JN214510 | USNM342033         | Egypt                  | 28.31668  | 31.11665  | Est | KC663540 |
| D145       | West. Sahara (Morocco) | 25.245083 | -14.821183 | -   | JN214511 | USNM342034         | Egypt                  | 28.53958  | 30.56909  | Est | KC663529 |
| D1630      | Mauritania             | 21.355050 | -13.024950 | -   | JN214512 | USNM342040         | Egypt                  | 29.69811  | 32.35410  | Est | KC663521 |
| D22        | Mauritania             | 17.899250 | -12.333783 | -   | JN214513 | USNM342084         | Sudan                  | 15.22898  | 36.38786  | Est | KC663515 |
| D3055      | Mauritania             | 17.895172 | -11.716192 | -   | JN214514 | USNM350066         | Egypt                  | 30.08107  | 31.58396  | Est | KC663536 |
| D3107      | Mauritania             | 18.020882 | -12.049943 | -   | JN214515 | USNM350757         | Iran                   | 29.77051  | 50.56836  | Est | KC663523 |
| D320       | Tunisia                | 33.014367 | 10.952350  | -   | JN214516 | USNM401212         | Mauritania             | 21.51667  | -13.05000 | Est | KC663571 |
| D493       | Mauritania             | 17.408217 | -16.062283 | -   | JN214517 | USNM475761         | Morocco                | 31.90000  | -4.48333  | Est | KC663578 |
| D506       | Mauritania             | 19.438717 | -14.753883 | -   | JN214518 | USNM475764         | Morocco                | 32.11667  | -2.85000  | Est | KC663573 |
| D511       | Mauritania             | 19.640667 | -14.521700 | -   | JN214519 | USNM475780         | Morocco                | 31.95000  | -3.55000  | Est | KC663575 |
| D52        | Mauritania             | 17.225267 | -7.068600  | -   | JN214520 | USNM475783         | Morocco                | 32.50000  | -2.05000  | Est | KC663574 |
| D53        | Mauritania             | 17.195050 | -7.141233  | -   | JN214531 | USNM475797         | Morocco                | 31.83333  | -4.58333  | Est | KC663524 |
| D535       | West. Sahara (Morocco) | 21.937267 | -16.875067 | -   | JN214521 | USNM475820         | Morocco                | 32.15000  | -1.25000  | Est | KC663525 |
| D536       | West. Sahara (Morocco) | 21.968500 | -16.874133 | -   | JN214532 | USNM475865         | Morocco                | 30.30000  | -5.93333  | Est | KC663579 |
| D541       | West. Sahara (Morocco) | 22.367417 | -16.462367 | -   | JN214522 | USNM475885         | Morocco                | 32.68333  | -3.08333  | Est | KC663572 |
| D549       | West. Sahara (Morocco) | 24.788033 | -14.865367 | -   | JN214523 | USNM482480         | Algeria                | 32.45619  | -0.57786  | Est | KC663531 |
| D576       | Morocco                | 29.389283 | -8.129267  | -   | JN214524 | USNM482482         | Algeria                | 30.05000  | -2.21667  | Est | KC663539 |
| D577       | Morocco                | 30.037683 | -6.894050  | -   | JN214525 | USNM482491         | Algeria                | 26.86667  | -0.96667  | Est | KC663549 |
| D578       | Morocco                | 30.037683 | -6.894050  | -   | JN214526 | USNM482499         | Algeria                | 23.56667  | 5.11667   | Est | KC663557 |
| D6         | Morocco                | 28.468800 | -11.021367 | -   | JN214527 | USNM482502         | Algeria                | 22.63333  | 5.73333   | Est | KC663565 |
| D684       | Morocco                | 31.074917 | -4.011250  | -   | JN214533 | USNM482503         | Algeria                | 22.93333  | 5.41667   | Est | KC663577 |
| D796       | West. Sahara (Morocco) | 24.686117 | -14.861950 | -   | JN214528 | USNM482504         | Algeria                | 23.16667  | 5.11667   | Est | KC663580 |
| D800       | West. Sahara (Morocco) | 25.306200 | -14.803383 | -   | JN214529 | USNM482671         | Niger                  | 16.55000  | 6.86667   | Est | KC663526 |
| D945       | Morocco                | 28.632800 | -10.752650 | -   | JN214530 | USNM482673         | Niger                  | 18.96667  | 5.96667   | Est | KC663513 |
| USNM279697 | Kuwait                 | 28.90207  | 48.08624   | Est | KC663547 | USNM482681         | Niger                  | 17.36667  | 6.71667   | Est | KC663512 |
| USNM282352 | Kuwait                 | 29.16563  | 46.91794   | Est | KC663548 | USNM482686         | Niger                  | 15.75000  | 6.60000   | Est | KC663514 |
| USNM282539 | Egypt                  | 30.08954  | 31.42529   | Est | KC663535 | USNM483105         | Morocco                | 28.76667  | -10.30000 | -   | KC663576 |
| USNM283260 | Egypt                  | 30.31072  | 32.27830   | Est | KC663538 | ZBSC0013           | Morocco                | 28.829343 | -10.26583 | -   | JN214534 |
| USNM297612 | Sudan                  | 19.53524  | 37.19247   | Est | KC663517 | ZBSC0019           | Mauritania             | 20.996882 | -16.28251 | -   | JN214535 |
| USNM297613 | Sudan                  | 19.86667  | 37.18333   | Est | KC663516 | ZBSC0021           | Mauritania             | 20.601737 | -16.01246 | -   | JN214536 |
| USNM317012 | Egypt                  | 22.52559  | 36.22540   | Est | KC663530 | ZBSC0027           | Mauritania             | 16.56601  | -14.19815 | -   | JN214537 |
| USNM317013 | Egypt                  | 22.26930  | 36.39740   | Est | KC663545 | ZBSC0028           | Mauritania             | 16.43478  | -14.03688 | -   | JN214538 |
| USNM317014 | Egypt                  | 22.29834  | 36.54394   | Est | KC663532 | ZBSC0064           | Mauritania             | 18.900835 | -15.41598 | -   | JN214539 |
| USNM317015 | Egypt                  | 31.51679  | 25.60661   | Est | KC663544 | ZBSC0070           | Mauritania             | 20.72443  | -16.0571  | Est | JN214540 |
| USNM317017 | Egypt                  | 25.67288  | 32.77148   | Est | KC663542 | ZBSC0072           | Mauritania             | 20.378803 | -15.99129 | -   | JN214541 |
| USNM317018 | Egypt                  | 30.40680  | 30.60440   | Est | KC663533 | ZBSC0081           | West. Sahara (Morocco) | 22.638767 | -16.33688 | Est | JN214542 |
| USNM317020 | Egypt                  | 30.49886  | 30.79409   | Est | KC663537 | ZBSC0082           | West. Sahara (Morocco) | 24.296773 | -15.33347 | -   | JN214543 |
| USNM317028 | Egypt                  | 25.25778  | 32.45711   | Est | KC663541 | ZBSC0083           | West. Sahara (Morocco) | 24.629537 | -14.94513 | -   | JN214544 |
| USNM317041 | Egypt                  | 30.21899  | 30.89907   | Est | KC663520 | ZBSC0084           | West. Sahara (Morocco) | 25.321792 | -14.79502 | -   | JN214545 |
| USNM317047 | Egypt                  | 29.49410  | 30.40152   | Est | KC663518 | ZBSC196            | West. Sahara (Morocco) | 24.00569  | -15.61102 | -   | KC663499 |
| USNM317049 | Egypt                  | 30.63450  | 29.83903   | Est | KC663519 | ZBSC197            | West. Sahara (Morocco) | 22.82889  | -16.24960 | -   | KC663500 |
| USNM317050 | Egypt                  | 30.09904  | 31.58075   | Est | KC663534 | ZBSC198            | West. Sahara (Morocco) | 22.55694  | -16.37038 | -   | KC663501 |
| USNM317059 | Egypt                  | 30.40680  | 30.60440   | Est | KC663522 | ZBSC218            | Mauritania             | 21.43810  | -12.98000 | Est | KC663502 |
| USNM317065 | Egypt                  | 24.00977  | 32.82735   | Est | KC663527 | ZBSC219            | Mauritania             | 21.35222  | -13.03868 | Est | KC663503 |
| USNM317068 | Egypt                  | 28.56239  | 33.96295   | Est | KC663546 | ZBSC224            | Mauritania             | 20.55665  | -12.57188 | Est | KC663582 |
| USNM319773 | Libya                  | 24.18333  | 23.31667   | Est | KC663552 | ZBSC226            | Mauritania             | 20.50774  | -12.83122 | Est | KC663504 |
| USNM321863 | Libya                  | 32.06458  | 11.35046   | Est | KC663567 | ZBSC240            | Mauritania             | 20.25413  | -13.29555 | Est | KC663505 |
| USNM321864 | Libya                  | 30.75000  | 11.51667   | Est | KC663551 | ZBSC241            | Mauritania             | 20.25278  | -13.31065 | -   | KC663506 |
| USNM322762 | Libya                  | 29.08894  | 15.89575   | Est | KC663564 | ZBSC242            | Mauritania             | 20.01584  | -13.88718 | Est | KC663583 |
| USNM322767 | Libya                  | 27.22384  | 14.66284   | Est | KC663559 | ZBSC243            | Mauritania             | 19.65052  | -14.50437 | -   | KC663507 |
| USNM322770 | Libya                  | 26.76667  | 14.00000   | Est | KC663555 | ZBSC244            | Mauritania             | 19.65052  | -14.50437 | -   | KC663508 |
| USNM322788 | Libya                  | 24.95334  | 10.20575   | Est | KC663556 | ZBSC245            | Mauritania             | 19.65052  | -14.50437 | -   | KC663509 |
| USNM322798 | Libya                  | 25.90257  | 13.89004   | Est | KC663558 | ZBSC256            | Mauritania             | 17.59071  | -12.84784 | Est | KC663581 |
| USNM322803 | Libya                  | 27.00000  | 14.45000   | Est | KC663568 | ZBSC265            | Mauritania             | 18.09402  | -12.13151 | -   | KC663510 |
| USNM322809 | Libya                  | 27.55000  | 14.25000   | Est | KC663553 | ZBSC267            | West. Sahara (Morocco) | 22.13568  | -16.56978 | -   | KC663511 |
| USNM322811 | Libya                  | 27.53333  | 13.20000   | Est | KC663554 | Allactaga elater   | -                      | -         | -         | -   | AJ389534 |
| USNM325770 | Libya                  | 32.41667  | 13.05000   | Est | KC663560 | complete mtDNA     | -                      | -         | -         | -   | NC005314 |
| USNM325774 | Libya                  | 29.25000  | 21.23333   | Est | KC663561 | Dipus sagitta      | -                      | -         | -         | -   | AM407909 |
| USNM325789 | Libya                  | 25.75000  | 21.15000   | Est | KC663570 | Jaculus orientalis | -                      | -         | -         | -   | JN652663 |
| USNM325802 | Libya                  | 29.75000  | 24.55000   | Est | KC663562 |                    |                        |           |           |     |          |

Table S2. Spatial (Path and Row) and temporal (Date) information of Landsat (Sat: L7 – Landsat 7 ETM+, L5 - Landsat 5 TM) scenes used in this study.

| Country  | Path | Row       | Date      | Sat       | Date      | Sat | Country    | Path      | Row       | Date      | Sat        | Date       | Sat |
|----------|------|-----------|-----------|-----------|-----------|-----|------------|-----------|-----------|-----------|------------|------------|-----|
| Pakistan | 155  | 41        | 23.4.2003 | L7        | 6.9.2000  | L5  | Tunisia    | 190       | 37        | 9.7.2003  | L5         | 20.6.2002  | L5  |
| Iran     | 157  | 41        | 21.4.2003 | L7        | 25.7.2000 | L5  | Niger      | 190       | 48        | 11.3.2003 | L7         | 13.11.2000 | L7  |
|          | 158  | 36        | 28.4.2003 | L7        | 30.6.2000 | L5  |            | 190       | 50        | 14.5.2003 | L7         | 21.5.2000  | L7  |
|          | 160  | 39        | 26.4.2003 | L7        | 28.6.2000 | L5  |            | 191       | 47        | 5.5.2003  | L7         | 16.8.2000  | L7  |
|          | 164  | 36        | 5.3.2003  | L7        | 1.2.2000  | L5  | Algeria    | 191       | 45        | 16.7.2003 | L5         | 27.6.2002  | L5  |
|          | 164  | 40        | 24.5.2003 | L7        | 19.8.2000 | L7  |            | 192       | 44        | 7.7.2003  | L5         | 17.5.2002  | L5  |
| Kuwait   | 165  | 40        | 29.4.2003 | L7        | 17.7.2000 | L5  | 194        | 42        | 21.7.2003 | L5        | 31.7.2001  | L5         |     |
|          | 166  | 40        | 22.5.2003 | L7        | 22.6.2000 | L5  | 195        | 41        | 12.7.2003 | L5        | 22.5.2002  | L5         |     |
| Sudan    | 171  | 46        | 9.5.2003  | L7        | 8.5.2000  | L5  | 195        | 42        | 12.7.2003 | L5        | 7.6.2002   | L5         |     |
|          | 171  | 47        | 9.5.2003  | L7        | 8.5.2000  | L5  | 197        | 38        | 26.7.2003 | L5        | 5.6.2002   | L5         |     |
|          | 171  | 49        | 9.5.2003  | L7        | 21.3.2000 | L5  | 198        | 39        | 1.7.2003  | L5        | 14.6.2000  | L7         |     |
| Egypt    | 175  | 45        | 5.5.2003  | L7        | 5.6.2000  | L5  | Morocco    | 198       | 37        | 1.7.2003  | L5         | 28.6.2002  | L5  |
|          | 172  | 45        | 11.7.2003 | L5        | 18.7.2000 | L5  |            | 198       | 38        | 1.7.2003  | L5         | 28.6.2002  | L5  |
|          | 173  | 43        | 18.7.2003 | L5        | 25.7.2000 | L5  |            | 199       | 36        | 24.7.2003 | L5         | 19.6.2002  | L5  |
|          | 174  | 40        | 9.7.2003  | L5        | 14.6.2000 | L5  | 199        | 37        | 24.7.2003 | L5        | 19.6.2002  | L5         |     |
|          | 175  | 40        | 16.7.2003 | L5        | 5.6.2000  | L5  | 199        | 38        | 25.8.2003 | L5        | 19.6.2002  | L5         |     |
|          | 175  | 42        | 16.7.2003 | L5        | 5.6.2000  | L5  | 199        | 39        | 24.7.2003 | L5        | 25.5.2002  | L5         |     |
|          | 176  | 39        | 7.7.2003  | L5        | 3.7.2000  | L5  | 200        | 37        | 31.7.2003 | L5        | 25.5.2002  | L5         |     |
|          | 176  | 40        | 7.7.2003  | L5        | 3.7.2000  | L5  | 200        | 38        | 31.7.2003 | L5        | 25.7.2001  | L5         |     |
|          | 176  | 41        | 23.7.2003 | L5        | 3.7.2000  | L5  | 200        | 39        | 31.7.2003 | L5        | 17.6.2002  | L5         |     |
|          | 176  | 43        | 7.7.2003  | L5        | 3.7.2000  | L5  | 201        | 39        | 6.7.2003  | L5        | 17.6.2002  | L5         |     |
|          | 177  | 38        | 14.7.2003 | L5        | 30.4.1999 | L5  | 201        | 40        | 6.7.2003  | L5        | 8.6.2002   | L5         |     |
|          | 177  | 39        | 14.7.2003 | L5        | 30.4.1999 | L5  | 202        | 40        | 27.7.2003 | L5        | 5.6.2000   | L7         |     |
|          | 177  | 40        | 30.7.2003 | L5        | 30.4.1999 | L5  | 202        | 41        | 16.4.2003 | L7        | 23.4.2000  | L7         |     |
|          | 178  | 38        | 21.7.2003 | L5        | 5.4.1999  | L5  | 203        | 40        | 20.7.2003 | L5        | 10.12.2000 | L7         |     |
|          | 178  | 39        | 21.7.2003 | L5        | 5.4.1999  | L5  | 205        | 43        | 21.4.2003 | L7        | 15.6.2000  | L7         |     |
| 179      | 38   | 12.7.2003 | L5        | 23.6.2002 | L5        | 205 | 45         | 5.4.2003  | L7        | 15.6.2000 | L7         |            |     |
| Lybia    | 180  | 38        | 19.7.2003 | L5        | 13.5.2002 | L5  | Mauritania | 199       | 48        | 26.3.2003 | L7         | 24.8.2000  | L7  |
|          | 180  | 43        | 3.7.2003  | L5        | 13.5.2002 | L5  |            | 202       | 48        | 31.3.2003 | L7         | 30.9.2000  | L7  |
|          | 181  | 39        | 26.7.2003 | L5        | 17.7.2000 | L5  |            | 203       | 41        | 7.4.2003  | L7         | 7.10.2000  | L7  |
|          | 182  | 37        | 17.7.2003 | L5        | 27.7.2001 | L5  | 203        | 45        | 22.3.2003 | L7        | 1.6.2000   | L7         |     |
|          | 182  | 38        | 1.7.2003  | L5        | 27.7.2001 | L5  | 203        | 46        | 23.4.2003 | L7        | 5.9.2000   | L7         |     |
|          | 182  | 40        | 17.7.2003 | L5        | 27.7.2001 | L5  | 203        | 48        | 6.3.2003  | L7        | 5.9.2000   | L7         |     |
|          | 182  | 42        | 17.7.2003 | L5        | 27.7.2001 | L5  | 203        | 49        | 23.4.2003 | L7        | 5.9.2000   | L7         |     |
|          | 183  | 39        | 8.7.2003  | L5        | 25.5.2002 | L5  | 204        | 45        | 14.4.2003 | L7        | 24.6.2000  | L7         |     |
|          | 184  | 38        | 15.7.2003 | L5        | 25.5.2002 | L5  | 204        | 46        | 14.4.2003 | L7        | 24.6.2000  | L7         |     |
|          | 184  | 39        | 15.7.2003 | L5        | 17.5.2002 | L5  | 204        | 47        | 14.4.2003 | L7        | 24.6.2000  | L7         |     |
|          | 185  | 39        | 6.7.2003  | L5        | 23.5.2002 | L5  | 204        | 48        | 13.3.2003 | L7        | 15.11.2000 | L7         |     |
|          | 186  | 38        | 13.7.2003 | L5        | 23.5.2002 | L5  | 205        | 46        | 5.4.2003  | L7        | 30.5.2000  | L7         |     |
|          | 186  | 40        | 29.7.2003 | L5        | 28.8.2000 | L5  | 205        | 47        | 5.4.2003  | L7        | 30.5.2000  | L7         |     |
|          | 187  | 38        | 4.7.2003  | L5        | 28.8.2000 | L5  | 205        | 48        | 5.4.2003  | L7        | 15.6.2000  | L7         |     |
|          | 187  | 41        | 4.7.2003  | L5        | 28.8.2000 | L5  | 206        | 45        | 28.4.2003 | L7        | 6.6.2000   | L7         |     |
| 187      | 42   | 4.7.2003  | L5        | 21.5.2002 | L5        | 206 | 46         | 28.4.2003 | L7        | 9.8.2000  | L7         |            |     |
| 188      | 38   | 27.7.2003 | L5        | 29.6.2002 | L5        |     |            |           |           |           |            |            |     |
| 188      | 42   | 27.7.2003 | L5        | 29.6.2002 | L5        |     |            |           |           |           |            |            |     |
| 189      | 38   | 2.7.2003  | L5        | 20.5.2000 | L7        |     |            |           |           |           |            |            |     |
| 189      | 43   | 18.7.2003 | L5        | 24.6.2000 | L7        |     |            |           |           |           |            |            |     |

## Surface reflectance calculation from satellite images

### *1.1 Remote Sensing data*

Satellite images from the Landsat 5 Thematic Mapper (TM) and Landsat 7 Enhanced Thematic Mapper (ETM<sup>+</sup>) series were obtained through the Global Visualization Viewer (GLOVIS; <http://glovis.usgs.gov/>) of the United States Geological Survey (USGS). The scenes were selected according to the samples location. The time period corresponded to the dry seasons of each region from 2003, and only images with a cloud cover lower than 10% were chosen. The final dataset comprised 180 satellite images (Table S2), with a spatial resolution of 30 m. The Landsat images were georeferenced by the USGS (<http://landsat.usgs.gov/>). The analyses were performed for the bands 1, 2 and 3 (blue, green and red, respectively) of every Landsat image. All analyses were developed in the ArcGIS 9.3 software (ESRI, 2008) on the WGS 1984 UTM datum.

### *1.2 Atmospheric correction*

An absolute atmospheric correction was performed in order to eliminate atmospheric effects and for obtaining the real surface reflectances. The absolute atmospheric correction was conducted in two steps: 1) the conversion of 8-bit satellite-quantised calibrated digital numbers (DN) to at-satellite radiance; and 2) the conversion of at-satellite radiance to atmospherically-corrected surface reflectance.

#### *1.2.1 Conversion of DN to at-satellite radiance*

The Landsat 5 TM and Landsat 7 ETM<sup>+</sup> images were converted to at-satellite radiance through the application of Eq.(1),

$$L_{\lambda} = G_{\text{rescale}} \times Q_{\text{cal}} + B_{\text{rescale}} \quad (1)$$

where

$L_\lambda$  = Spectral radiance at the sensor's aperture [W/(m<sup>2</sup> sr μm)]

$G_{\text{rescale}}$  = Band-specific rescaling gain factor [(W/(m<sup>2</sup> sr μm))/DN]

$Q_{\text{cal}}$  = Quantised calibrated pixel value [DN]

$B_{\text{rescale}}$  = Band-specific rescaling bias factor [W/(m<sup>2</sup> sr μm)]

The  $G_{\text{rescale}}$  and  $B_{\text{rescale}}$  parameters published by Chander *et al.* (2009), were used for each specific band. The calculations were conducted through the Spatial Analyst extension for ArcGIS.

### 1.2.2 Conversion of at-satellite radiance to surface reflectance

The at-satellite radiances were converted to surface reflectances (assuming a uniform Lambertian surface under cloudless conditions) using Eq.(2),

$$\rho = \pi (L_\lambda - L_p) / T_v [E_0 \times \cos(\theta) \times T_z + E_{\text{down}}] \quad (2)$$

where

$\rho$  = Estimated surface reflectance

$L_\lambda$  = Spectral radiance at the sensor's aperture [W/(m<sup>2</sup> sr μm)]

$L_p$  = Path radiance [W/(m<sup>2</sup> sr μm)]

$T_v$  = Atmospheric transmittance from the target toward the sensor

$E_0$  = Exoatmospheric solar constant [W/(m<sup>2</sup> sr μm)] (corrected for solar distance)

$\theta$  = Solar zenith angle [degrees]

$T_z$  = Atmospheric transmittance in the illumination direction

$E_{\text{down}}$  = Downwelling diffuse irradiance [W/(m<sup>2</sup> μm)]

The cosine of the solar zenith angle is equal to the sine of the solar elevation angle, which is a parameter that is stored in the Level 1 product header file (.MTL) of each Landsat scene (Chander *et al.*, 2009). The  $E_0$  resulted from the correction of the exoatmospheric solar constant for the Earth-Sun distance. Both parameters were defined according to the values published by Chander *et al.* (2009). The parameters  $T_v$ ,  $T_z$  and  $E_{down}$  were obtained through the first Dark Object Subtraction (DOS) approach proposed by Song *et al.*, (2001). The DOS approach has been referenced as a simple and accurate method in the absolute atmospheric correction of satellite images (Song *et al.*, 2001; Schroeder *et al.*, 2006). The  $L_p$  was estimated using Eq.(3),

$$L_p = G_{rescale} \times DN_{dark} + B_{rescale} - 0.01 [E_0 \times \cos(\theta) \times T_z + E_{down}] T_v / \pi \quad (3)$$

where

$DN_{dark}$  = Darkest DN value in each spectral band with at least one thousand pixels (Teillet and Fedosejevs, 1995; McDonald *et al.*, 1998)

All the calculations for the three specific bands of each Landsat scene were performed by the Spatial Analyst.

### 1.3 Reflectances of the *Jaculus* samples

Buffers with 1, 5 and 10 km radius were built around each *Jaculus* sample, using the Proximity tool of the Analysis extension for ArcGIS. For obtaining the surface background reflectance of the samples, the atmospherically corrected images were intersected with the buffers. The minimum, maximum, mean and standard deviation of the reflectance values comprised by the buffers were calculated and extracted through the Zonal Statistics tool of Spatial Analyst.

## References

- Chander, G., Markham, B.L., Helder, D.L., 2009. Summary of current radiometric calibration coefficients for Landsat MSS, TM, ETM<sup>+</sup>, and EO-1 ALI sensors. *Remote Sensing of Environment*, 113, 893–903.
- ESRI, 2008. *Arcmap 9.3*. Environmental Systems Research Institute, Inc., Redlands, California.
- McDonald, A.J., Gemmill, F.M., Lewis, P.E., 1998. Investigation of the utility of spectral vegetation indices for determining information on coniferous forests. *Remote Sensing of Environment*, 66, 250–272.
- Schroeder, T.A., Cohen, W.B., Song, C., Canty, M.J., Yang, Z., 2006. Radiometric correction of multi-temporal Landsat data for characterization of early successional forest patterns in western Oregon. *Remote Sensing of Environment*, 103, 16–26.
- Song, C., Woodcock, C. E., Seto, K. C., Pax-Lenney, M., Macomber, S. A., 2001. Classification and change detection using Landsat TM data: When and how to correct atmospheric effects. *Remote Sensing of Environment*, 75, 230–244.
- Teillet, P.M., Fedosejevs, G., 1995. On the dark target approach to atmospheric correction of remotely sensed data. *Canadian Journal of Remote Sensing*, 21, 373–387.

Table S3. Partial Pearson correlations between individual and environmental colours, accounting for sample affiliation either to museum or to field collections.

| colour   | r     | t     | df | p      |
|----------|-------|-------|----|--------|
| All data |       |       |    |        |
| red      | 0.39  | 3.65  | 77 | 0.0002 |
| green    | 0.30  | 2.76  | 77 | 0.0057 |
| blue     | 0.23  | 2.08  | 77 | 0.037  |
| Clade 1  |       |       |    |        |
| red      | 0.44  | 3.21  | 47 | 0.0013 |
| green    | 0.31  | 2.18  | 47 | 0.029  |
| blue     | 0.33  | 2.31  | 47 | 0.021  |
| Clade 2  |       |       |    |        |
| red      | 0.39  | 2.21  | 30 | 0.027  |
| green    | 0.41  | 2.32  | 30 | 0.020  |
| blue     | -0.16 | -0.82 | 30 | 0.41   |

Table S4. Model components and parameters from AIC model selection procedure. Fur luminosity and RGB colours, the dependent variables, were analysed in separate mixed models that included clade (two clades) and museum/field affiliations as fixed factors, environmental luminosity and RGB colours, and their factorial interactions, as continuous predictors, and random factor of individual code. Best models depicted by AIC are in bold.

| Museum samples only             |                                   | Models parameters |               |              |             |             |
|---------------------------------|-----------------------------------|-------------------|---------------|--------------|-------------|-------------|
| Dependent and                   | independent variables             | df                | logLik        | AICc         | Delta       | Weight      |
| Fur Luminosity                  |                                   |                   |               |              |             |             |
|                                 | <b>Clade+Red+Green</b>            | <b>6</b>          | <b>-257.6</b> | <b>556.4</b> | <b>0.00</b> | <b>0.31</b> |
|                                 | Clade+Red+Blue+Luminosity         | 7                 | -252.6        | 557.6        | 1.20        | 0.17        |
|                                 | Clade+Red+Blue+Green              | 7                 | -253.1        | 557.6        | 1.20        | 0.17        |
|                                 | Clade+Red+Green+Luminosity        | 7                 | -250.9        | 557.6        | 1.20        | 0.17        |
|                                 | Clade+Blue+Green+Luminosity       | 7                 | -251.9        | 557.6        | 1.20        | 0.17        |
| Fur Red                         |                                   |                   |               |              |             |             |
|                                 | <b>Clade+Red+Green</b>            | <b>6</b>          | <b>-264.6</b> | <b>571.2</b> | <b>0.00</b> | <b>0.39</b> |
|                                 | Clade+Red+Blue+Luminosity         | 7                 | -259.8        | 573.0        | 1.84        | 0.15        |
|                                 | Clade+Red+Blue+Green              | 7                 | -260.3        | 573.0        | 1.84        | 0.15        |
|                                 | Clade+Red+Green+Luminosity        | 7                 | -258.1        | 573.0        | 1.84        | 0.15        |
|                                 | Clade+Blue+Green+Luminosity       | 7                 | -259.1        | 573.0        | 1.84        | 0.15        |
| Fur Blue                        |                                   |                   |               |              |             |             |
|                                 | <b>Clade+Red+Green</b>            | <b>6</b>          | <b>-244.5</b> | <b>528.4</b> | <b>0.00</b> | <b>0.23</b> |
|                                 | Clade+Red+Luminosity              | 6                 | -244.1        | 528.6        | 0.22        | 0.2         |
|                                 | Clade+Red+Blue+Luminosity+C.*B.   | 8                 | -233.6        | 528.7        | 0.34        | 0.19        |
|                                 | Clade+Red+Blue+Green+C.*B.        | 8                 | -234.1        | 528.7        | 0.34        | 0.19        |
|                                 | Clade+Blue+Green+Luminosity+C.*B. | 8                 | -232.9        | 528.7        | 0.34        | 0.19        |
| Fur Green                       |                                   |                   |               |              |             |             |
|                                 | <b>Clade+Red+Green</b>            | <b>6</b>          | <b>-257.5</b> | <b>556.1</b> | <b>0.00</b> | <b>0.27</b> |
|                                 | Clade+Red+Luminosity              | 6                 | -257.3        | 556.7        | 0.65        | 0.2         |
|                                 | Clade+Red+Blue                    | 6                 | -260.0        | 556.9        | 0.76        | 0.19        |
|                                 | Clade+Red+Blue+Luminosity         | 7                 | -252.3        | 557.0        | 0.88        | 0.17        |
|                                 | Clade+Red+Blue+Green              | 7                 | -252.9        | 557.0        | 0.89        | 0.17        |
| Museum and African samples only |                                   |                   |               |              |             |             |
| Fur Luminosity                  |                                   |                   |               |              |             |             |
|                                 | <b>Clade+Red+Green</b>            | <b>6</b>          | <b>-245.8</b> | <b>533.4</b> | <b>0.00</b> | <b>0.25</b> |
|                                 | Clade+Red                         | 5                 | -253.2        | 533.5        | 0.09        | 0.24        |
|                                 | Clade+Luminosity                  | 5                 | -252.9        | 534.1        | 0.65        | 0.18        |
|                                 | Clade+Red+Blue                    | 6                 | -248.4        | 534.2        | 0.76        | 0.17        |
|                                 | Clade+Red+Blue+Blue*Clade         | 7                 | -242.6        | 534.5        | 1.11        | 0.15        |
| Fur Red                         |                                   |                   |               |              |             |             |
|                                 | <b>Clade+Red+Green</b>            | <b>6</b>          | <b>-252.7</b> | <b>548.2</b> | <b>0.00</b> | <b>0.33</b> |
|                                 | Clade+Red                         | 5                 | -260.5        | 549.0        | 0.81        | 0.22        |
|                                 | Clade+Red+Green+C.*G.+C.*R.       | 8                 | -238.3        | 549.2        | 1.02        | 0.2         |
|                                 | Clade+Red+Blue+Luminosity         | 7                 | -247.7        | 550.0        | 1.84        | 0.13        |
|                                 | Clade+Red+Blue+Green              | 7                 | -248.3        | 550.0        | 1.84        | 0.13        |
| Fur Blue                        |                                   |                   |               |              |             |             |
|                                 | <b>Clade+Red+Blue+C.*B.</b>       | <b>7</b>          | <b>-229.1</b> | <b>505.4</b> | <b>0.00</b> | <b>0.29</b> |
|                                 | Clade+Red                         | 5                 | -240.1        | 506.2        | 0.80        | 0.19        |
|                                 | Clade+Luminosity                  | 5                 | -239.6        | 506.2        | 0.81        | 0.19        |
|                                 | Clade+Red+Blue                    | 6                 | -235.4        | 506.5        | 1.05        | 0.17        |
|                                 | Clade+Red+Blue+Luminosity+C.*B.   | 8                 | -222.0        | 506.6        | 1.19        | 0.16        |
| Fur Green                       |                                   |                   |               |              |             |             |
|                                 | <b>Clade+Red</b>                  | <b>5</b>          | <b>-252.7</b> | <b>532.6</b> | <b>0.00</b> | <b>0.23</b> |
|                                 | Clade+Luminosity                  | 5                 | -252.3        | 532.8        | 0.19        | 0.21        |
|                                 | Clade+Red+Green                   | 6                 | -245.5        | 532.9        | 0.29        | 0.2         |
|                                 | Clade+Red+Blue                    | 6                 | -247.8        | 533.0        | 0.38        | 0.19        |
|                                 | Clade+Red+Blue+C.*B.              | 7                 | -241.9        | 533.1        | 0.43        | 0.18        |



Table S5. Relative variable importance in explaining variation in animals' overall dorsal fur luminosity and RGB colours. Fur luminosity and RGB colours, the dependent variables, were analysed in separate mixed models that included clade (two clades) and museum/field affiliations as fixed factors, environmental luminosity and RGB colours, and their factorial interactions, as continuous predictors, and random factor of individual code. Average values in bold are above 0.6.

| All data                | Clade       | M/F         | Green       | Red         | Lum. | Blue |       | M/F*R. | C.*R. | M/F*G. | C.*G. | C.*L. |
|-------------------------|-------------|-------------|-------------|-------------|------|------|-------|--------|-------|--------|-------|-------|
| Fur Luminosity          | 1           | 1           | 0.8         | 0.8         | 0.5  | 0.5  |       | 0      | 0     | 0      | 0     | 0     |
| Fur Red                 | 1           | 1           | 1           | 1           | 0    | 0    |       | 0.5    | 0.3   | 0.2    | 0.1   | 0     |
| Fur Blue                | 1           | 0           | 0.7         | 0.3         | 0.8  | 0.3  |       | 0      | 0     | 0.0    | 0.2   | 0.4   |
| Fur Green               | 1           | 1           | 0.6         | 0.8         | 0.4  | 0.6  |       | 0      | 0     | 0      | 0     | 0     |
| average                 | <b>1.00</b> | <b>0.75</b> | <b>0.78</b> | <b>0.73</b> | 0.43 | 0.35 |       | 0.13   | 0.07  | 0.05   | 0.09  | 0.10  |
| Museum sample           | Clade       |             | Green       | Red         | Lum. | Blue | C.*B. |        |       |        |       |       |
| Fur Luminosity          | 1           |             | 0.83        | 0.83        | 0.52 | 0.52 | 0     |        |       |        |       |       |
| Fur Red                 | 1           |             | 0.85        | 0.85        | 0.46 | 0.46 | 0     |        |       |        |       |       |
| Fur Blue                | 1           |             | 0.81        | 0.61        | 0.58 | 0.57 | 0.57  |        |       |        |       |       |
| Fur Green               | 1           |             | 0.64        | 0.8         | 0.37 | 0.53 | 0     |        |       |        |       |       |
| average                 | <b>1.00</b> |             | <b>0.78</b> | <b>0.77</b> | 0.48 | 0.52 | 0.14  |        |       |        |       |       |
| Museum, African samples | Clade       |             | Green       | Red         | Lum. | Blue | C.*B. | C.*R.  |       | C.*G.  |       |       |
| Fur Luminosity          | 1           |             | 0.25        | 0.82        | 0.18 | 0.32 | 0.15  | 0      |       | 0      |       |       |
| Fur Red                 | 1           |             | 0.65        | 0           | 0    | 0.26 | 0.13  | 0.2    |       | 0.2    |       |       |
| Fur Blue                | 1           |             | 0           | 0.81        | 0.35 | 0.62 | 0.45  | 0      |       | 0      |       |       |
| Fur Green               | 1           |             | 0.2         | 0.79        | 0.21 | 0.37 | 0.18  | 0      |       | 0      |       |       |
| average                 | <b>1.00</b> |             | 0.28        | <b>0.61</b> | 0.19 | 0.39 | 0.23  | 0.05   |       | 0.05   |       |       |

Table S6. Best model results of mixed models analyses for variations in animals' overall dorsal fur luminosity and RGB colours depicted from AIC model selection procedure.

| Dependent                       | Independent variables | Value  | SE     | DF | t-value | p-value |
|---------------------------------|-----------------------|--------|--------|----|---------|---------|
| Museum samples only             |                       |        |        |    |         |         |
| Fur Luminosity                  |                       |        |        |    |         |         |
|                                 | (Intercept)           | 138.3  | 11.0   | 64 | 12.54   | <.0001  |
|                                 | Clade                 | -11.5  | 3.5    | 64 | -3.28   | 0.0017  |
|                                 | Green10M              | -342.9 | 167.1  | 64 | -2.05   | 0.044   |
|                                 | Red10M                | 254.9  | 78.3   | 64 | 3.26    | 0.0018  |
| Fur Red                         |                       |        |        |    |         |         |
|                                 | (Intercept)           | 184.0  | 12.3   | 64 | 14.96   | <.0001  |
|                                 | Clade                 | -15.3  | 3.9    | 64 | -3.91   | 0.0002  |
|                                 | Green10M              | -412.1 | 186.42 | 64 | -2.21   | 0.031   |
|                                 | Red10M                | 290.1  | 87.3   | 64 | 3.32    | 0.0015  |
| Fur Blue                        |                       |        |        |    |         |         |
|                                 | (Intercept)           | 92.4   | 9.0    | 64 | 10.29   | <.0001  |
|                                 | Clade                 | -6.7   | 2.9    | 64 | -2.34   | 0.022   |
|                                 | Green10M              | -264.6 | 136.1  | 64 | -1.94   | 0.056   |
|                                 | W10km                 | 200.8  | 63.7   | 64 | 3.15    | 0.0025  |
| Fur Green                       |                       |        |        |    |         |         |
|                                 | (Intercept)           | 124.9  | 11.0   | 64 | 11.35   | <.0001  |
|                                 | Clade                 | -10.5  | 3.5    | 64 | -3.00   | 0.0001  |
|                                 | Green10M              | -323.0 | 166.8  | 64 | -1.94   | 0.057   |
|                                 | Red10M                | 247.6  | 78.1   | 64 | 3.17    | 0.0023  |
| Museum and African samples only |                       |        |        |    |         |         |
| Fur Luminosity                  |                       |        |        |    |         |         |
|                                 | (Intercept)           | 124.0  | 12.5   | 62 | 9.93    | <.0001  |
|                                 | Clade                 | -10.8  | 3.8    | 62 | -2.84   | 0.01    |
|                                 | Red10M                | 127.3  | 34.0   | 62 | 3.75    | 0.0004  |
| Fur Red                         |                       |        |        |    |         |         |
|                                 | (Intercept)           | 168.0  | 14.1   | 62 | 11.95   | <.0001  |
|                                 | Clade                 | -14.7  | 4.3    | 62 | -3.43   | 0.0011  |
|                                 | Red10M                | 133.6  | 38.3   | 62 | 3.49    | 0.0009  |
| Fur Blue                        |                       |        |        |    |         |         |
|                                 | (Intercept)           | 80.6   | 10.1   | 62 | 7.96    | <.0001  |
|                                 | Clade                 | -56.0  | 3.1    | 62 | -1.93   | 0.0579  |
|                                 | Red10M                | 104.4  | 27.5   | 62 | 3.79    | 0.0003  |
|                                 | Clade:Blue10M         |        |        |    |         |         |
| Fur Green                       |                       |        |        |    |         |         |
|                                 | (Intercept)           | 111.0  | 12.4   | 62 | 8.95    | <.0001  |
|                                 | Clade                 | -9.8   | 3.8    | 62 | -2.58   | 0.0122  |
|                                 | Red10M                | 128.6  | 33.7   | 62 | 3.81    | 0.0003  |

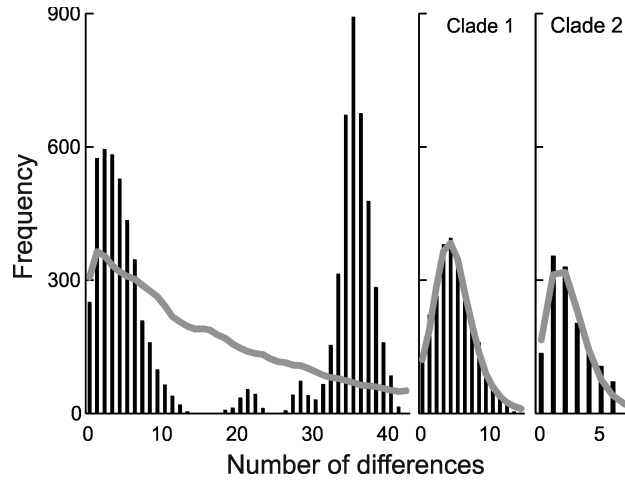

Observed (bars) and expected (lines) differences between cytochrome b haplotypes.
